# Supplementary material for: p53-driven lipidome influences non-cell-autonomous lysophospholipids in pancreatic cancer
Source: PubMed Central journal article supplement (PMC8902766; doi:10.1186/s13062-022-00319-9), 2022-03-08

# Supplementary Figure 1

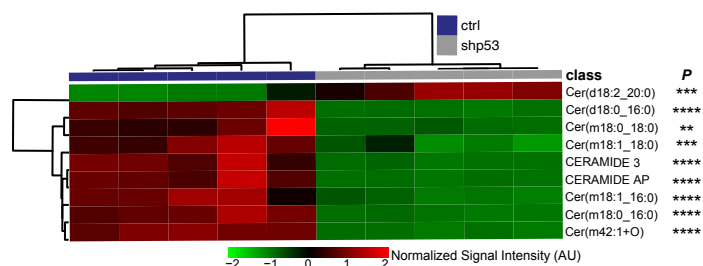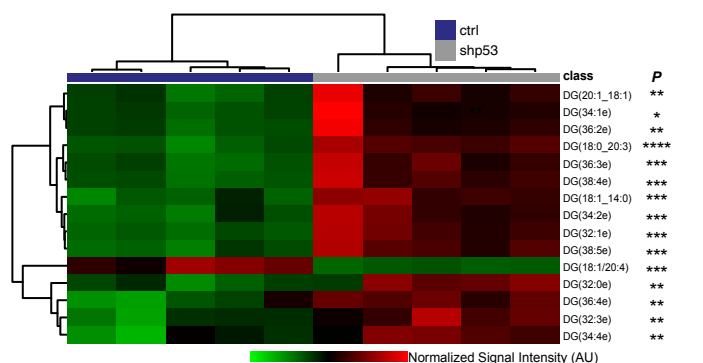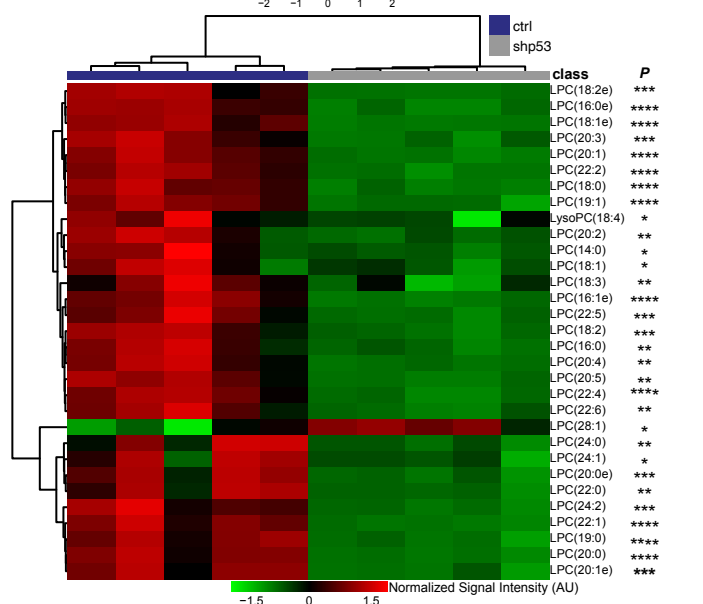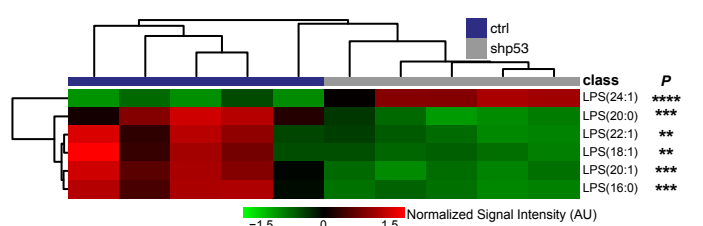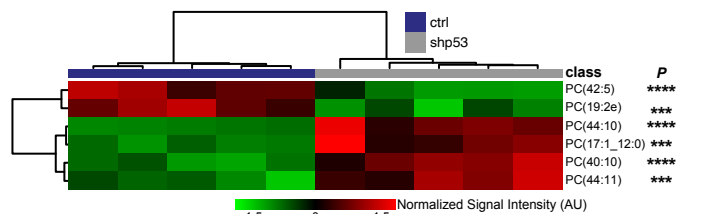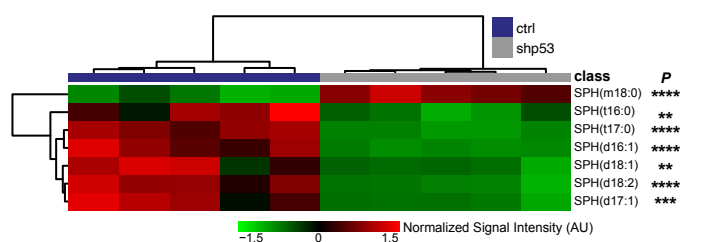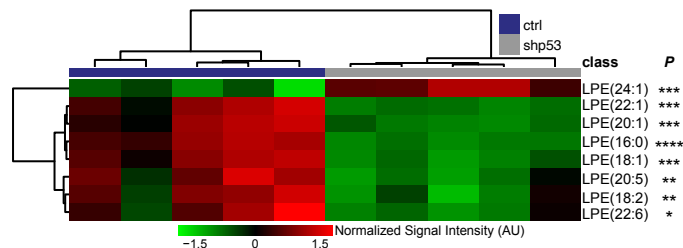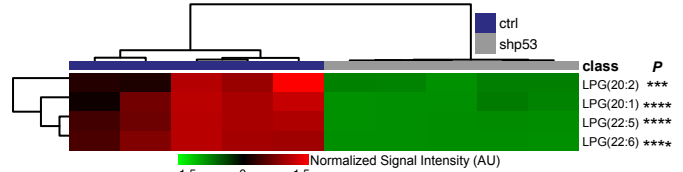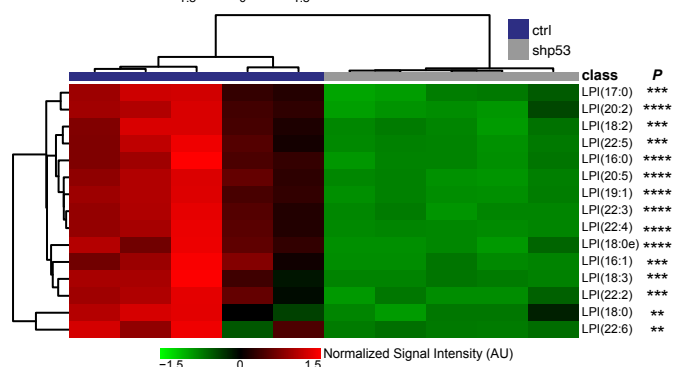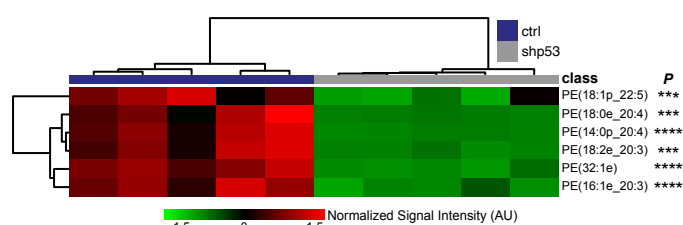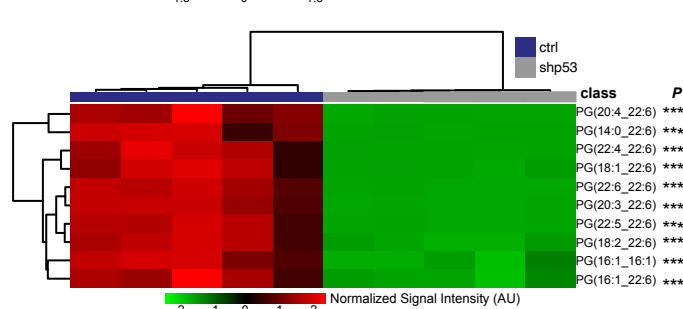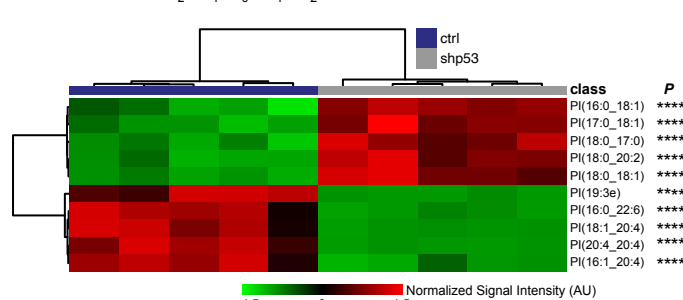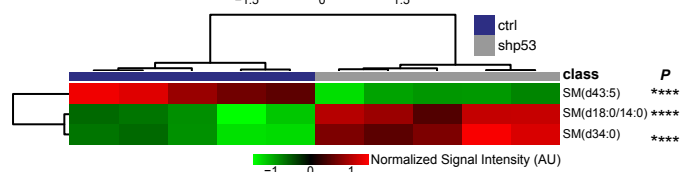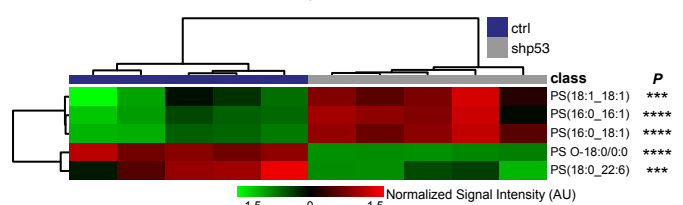

Supplementary Figure 2

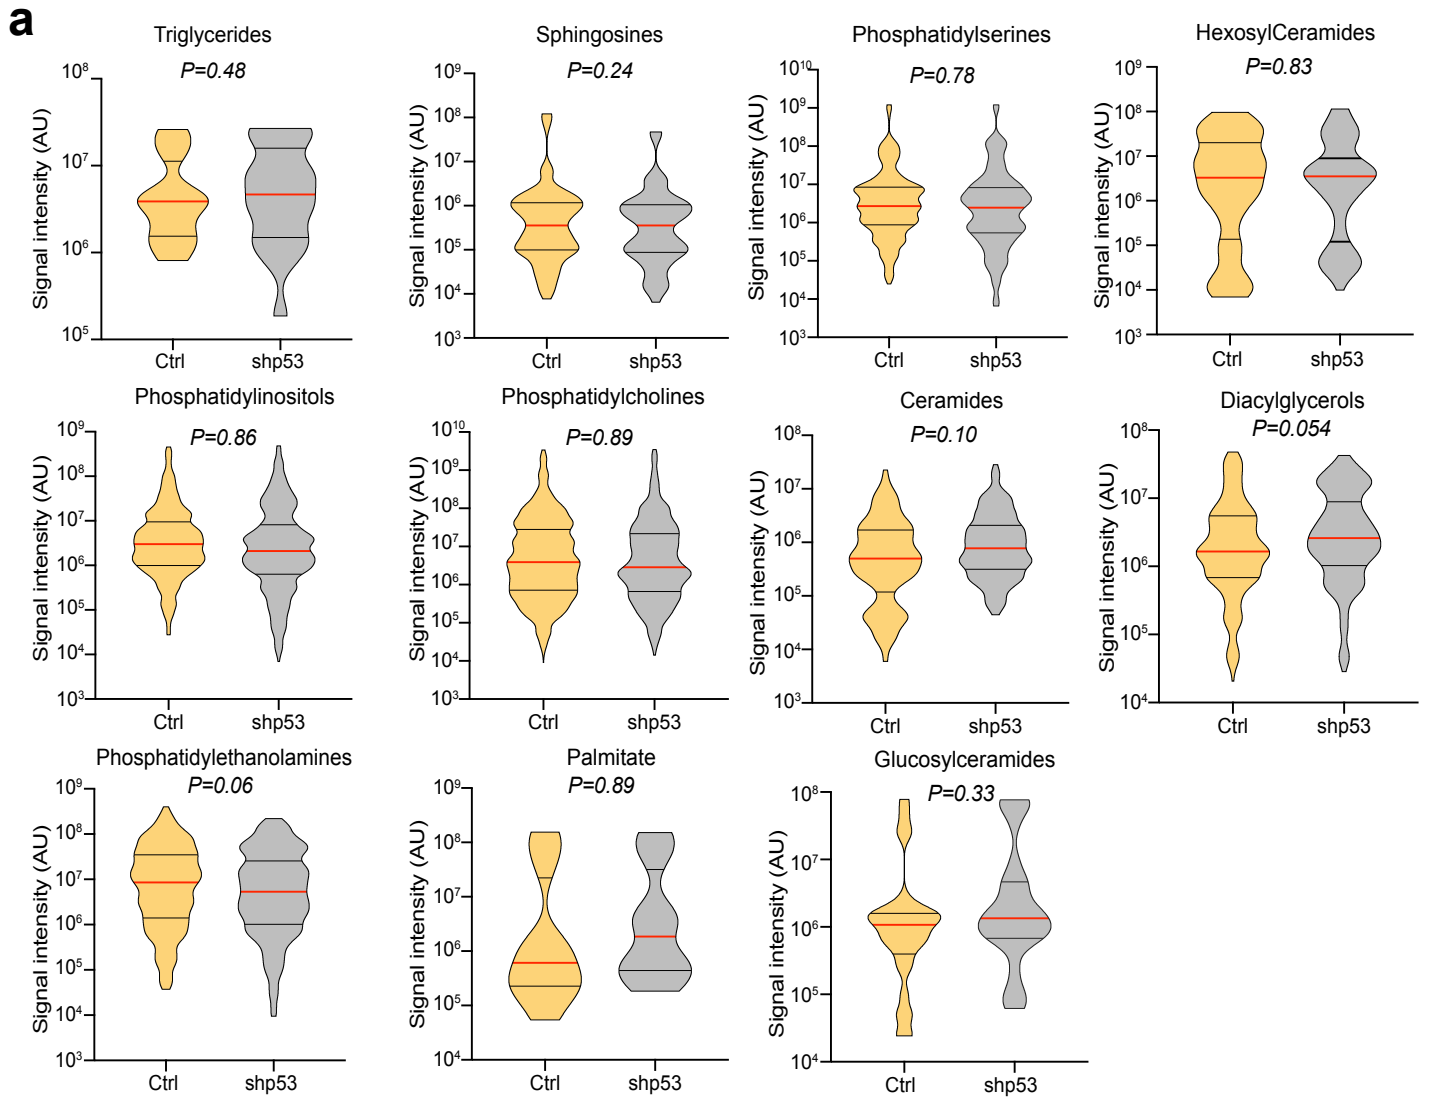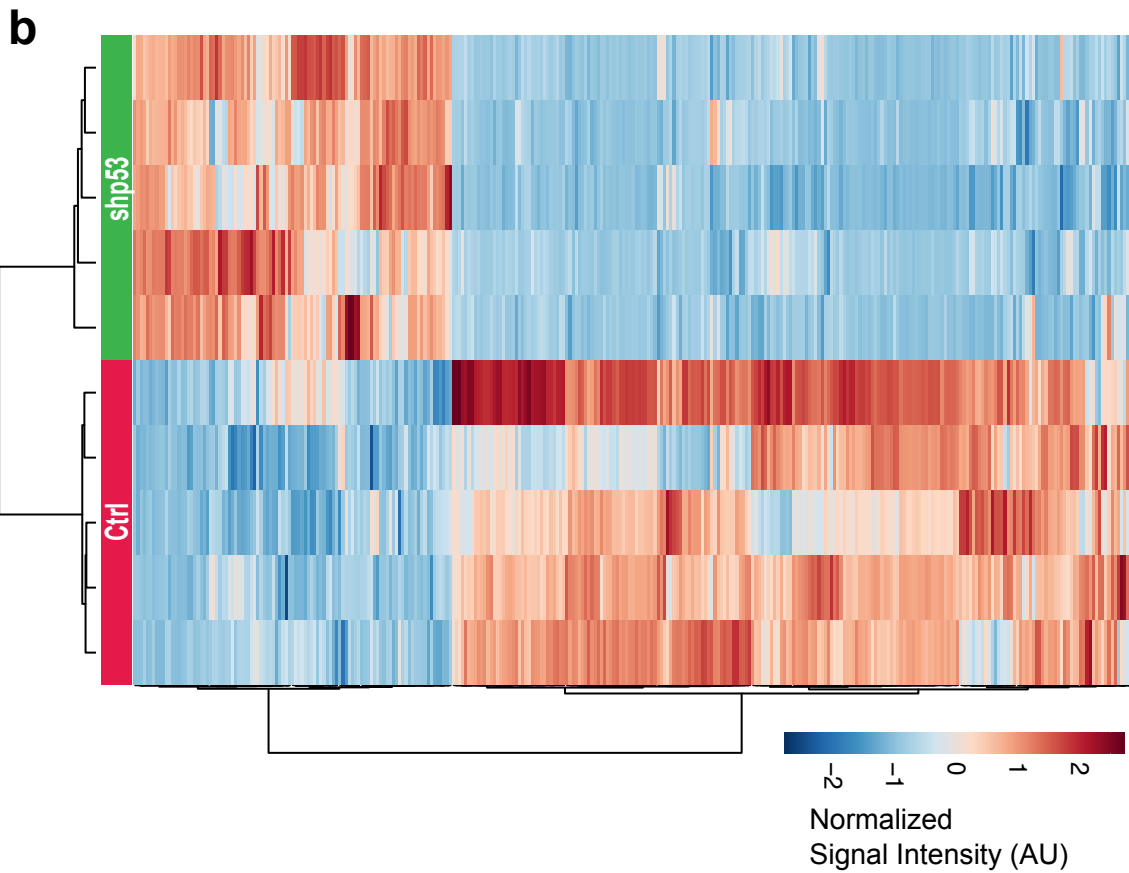

# Supplementary Figure 3

**a**

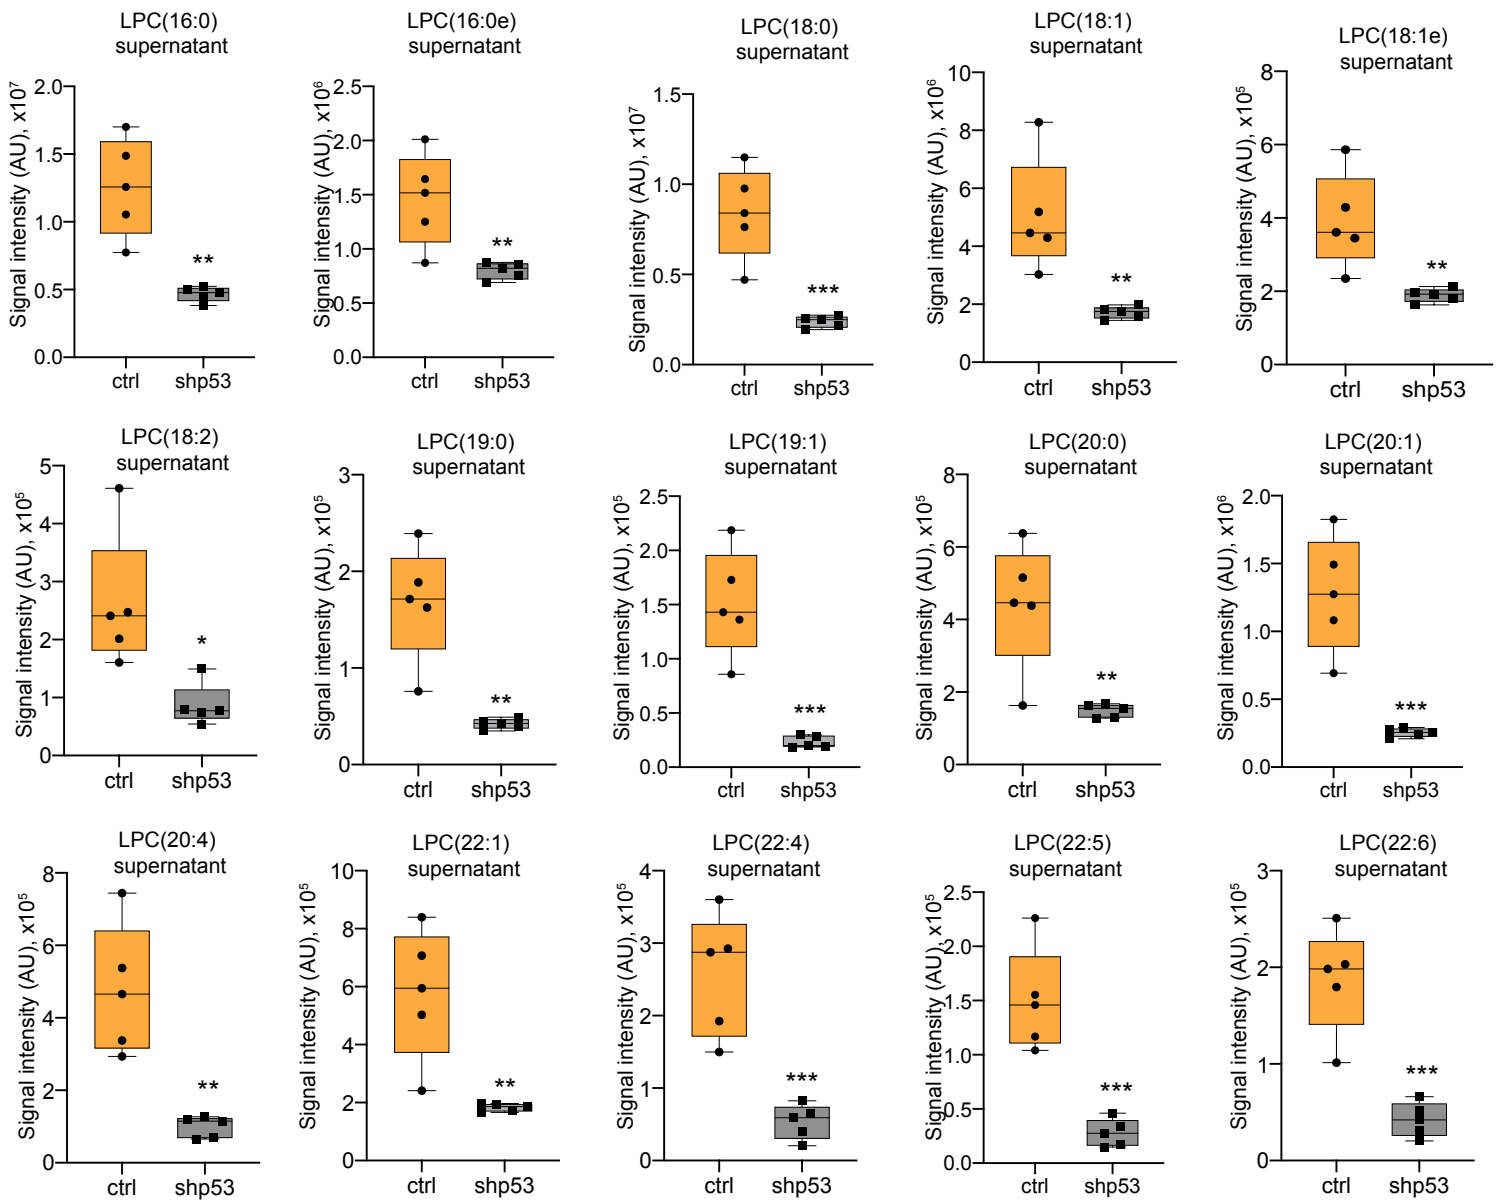

**a**

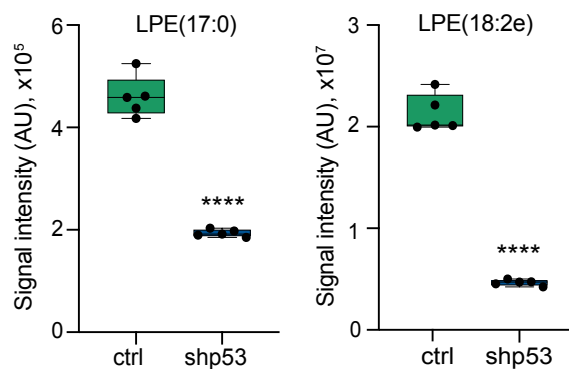

**b**

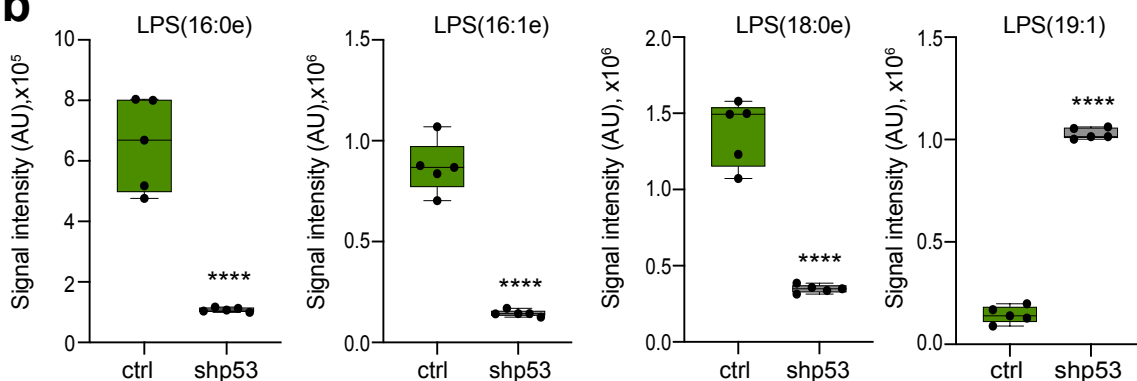

**c**

Significantly affected lysophosphatidylinositol species (top 5)

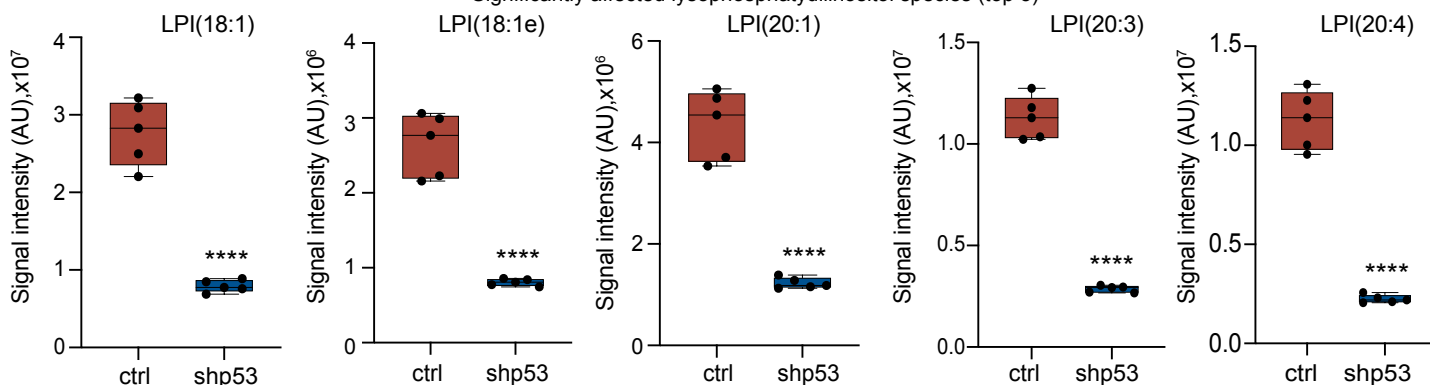

**d**

Significantly affected lysophosphatidylglycerol species (top 5)

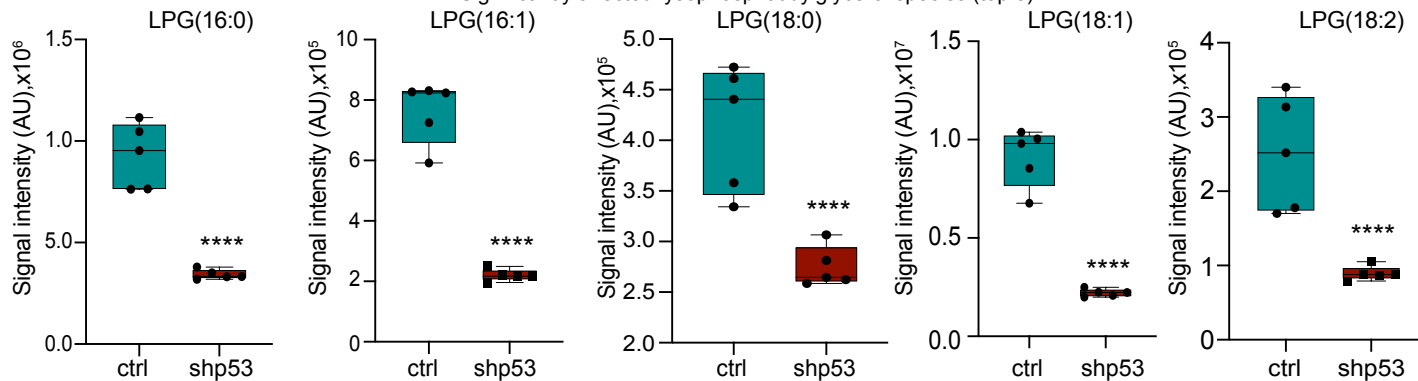

Supplement: 13062_2022_319_MOESM1_ESM.pdf [file 13062_2022_319_MOESM1_ESM.pdf]
